# Supplementary material
Source: MDPI journal article supplement (https://www.mdpi.com/2073-4352/7/5/135)
Supplement: s1 [file s1]

# Phase transition behavior of the layered perovskite $\text{CsBi}_{0.6}\text{La}_{0.4}\text{Nb}_2\text{O}_7$ : a hybrid improper ferroelectric

Charlotte A. L. Dixon<sup>1</sup>, Jason A. McNulty<sup>1</sup>, Kevin S. Knight<sup>2,3</sup>, Alexandra S. Gibbs<sup>4</sup> and Philip Lightfoot<sup>1,\*</sup>

## Supplementary Material

**Synthesis:** The  $\text{CsBi}_{1-x}\text{La}_x\text{Nb}_2\text{O}_7$  solid solution (for  $0 < x < 1$ , in 0.1 increments) was synthesised using traditional ceramic methods. Stoichiometric amounts of  $\text{La}_2\text{O}_3$  (99.9 % Sigma-Aldrich),  $\text{Nb}_2\text{O}_5$  (99.9 % Alfa Aesar) and a 20 % excess of  $\text{Cs}_2\text{CO}_3$  (99 % Alfa Aesar) were dried at 100 °C for 24 hours. The loose powders were ground for a period of 30 minutes and pressed into pellets of approximately 10 mm diameter and 5 mm thickness. The pellets were annealed at 1000 °C for a period of 24 hours with a cooling rate of 10 °min<sup>-1</sup>.

**Powder Diffraction:** X-ray powder diffraction was carried out using a PANalytical Empyrean diffractometer (Cu  $K_{\alpha 1}$  radiation source). Diffraction patterns were collected over the  $2\theta$  range  $3 \leq 2\theta \leq 70$  °C and a collection time of 1 hour. Analysis using Rietveld refinement methods of the resulting diffraction patterns was carried out with the GSAS software package and EXPGUI interface.

The Rietveld refinement models used were the  $P2_1am$  model for  $0 < x \leq 0.5$  and the parent  $P4/mmm$  model for  $x > 0.5$ . For the  $x > 0.5$  compositions we acknowledge that although the unit cells are *metrically* tetragonal, within the resolution of our instrumentation, the true symmetry is likely to be the  $Amm2$  model reported for  $\text{CsLaNb}_2\text{O}_7$ . This approximation has negligible influence on the lattice parameters reported here, which are intended only to demonstrate that a continuous solid solution exists, and that the composition  $\text{CsBi}_{0.6}\text{La}_{0.4}\text{Nb}_2\text{O}_7$  targeted here is validated experimentally, in the absence of precise chemical analysis.

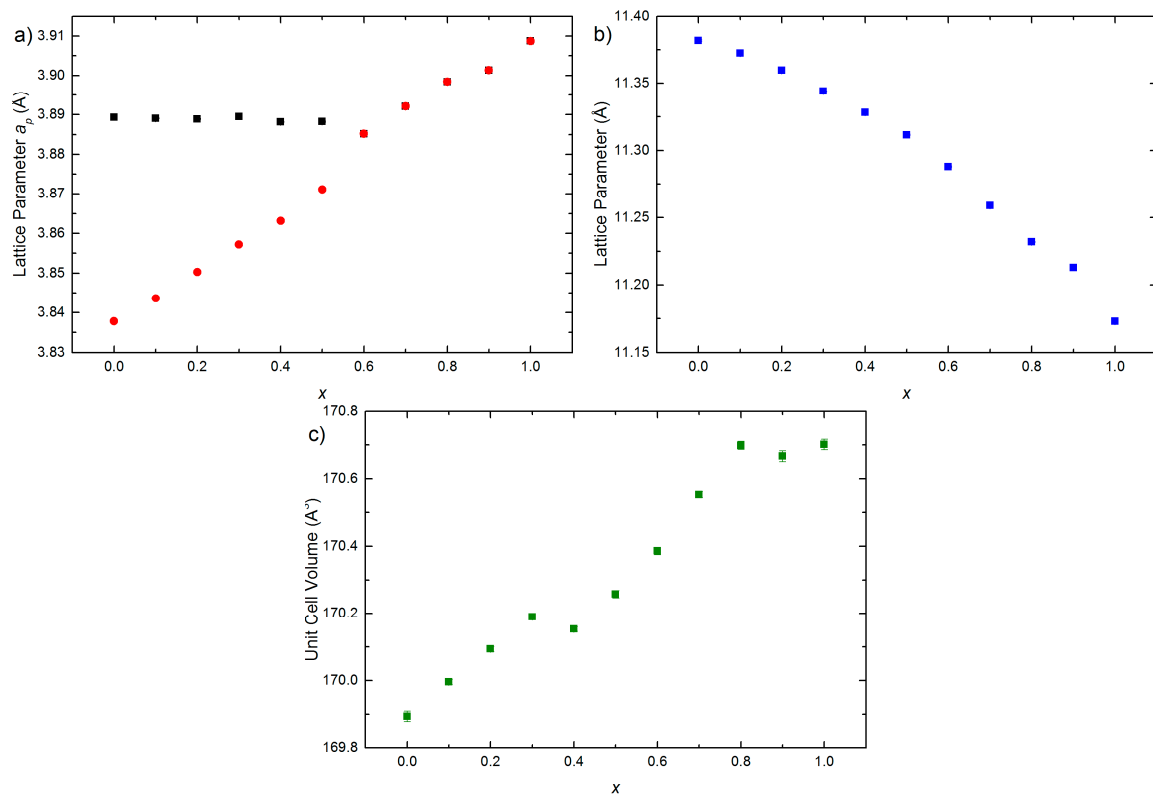

**Figure S1:** a) normalised  $a$  (black squares) and  $b$  (red circles) lattice parameters obtained for varying values of  $x$  across the solid solution  $\text{CsBi}_{1-x}\text{La}_x\text{Nb}_2\text{O}_7$ , b)  $c$  lattice parameter for varying values of  $x$  and c) (normalized) unit cell volume for varying values of  $x$ .
